# Supplementary material for: Comparative Analysis of Different Proteins and Metabolites in the Liver and Ovary of Local Breeds of Chicken and Commercial Chickens in the Later Laying Period
Source: MDPI journal article supplement (doi:10.3390/ijms241814394), 2023-09-21
Supplement: s1 [file s1]

**Table S1.** Results of BCA quantification of proteins in liver samples

| Serial number | Sample name | Volumes (μL) | Concentration (μg/μL) | Overall amount (μg) |
|---------------|-------------|--------------|-----------------------|---------------------|
| 1             | G-L-1       | 350          | 26.13                 | 9145.5              |
| 2             | G-L-2       | 350          | 21.83                 | 7640.5              |
| 3             | G-L-3       | 350          | 25.66                 | 8981.0              |
| 4             | H-L-1       | 350          | 30.07                 | 10524.5             |
| 5             | H-L-2       | 350          | 25.57                 | 8949.5              |
| 6             | H-L-3       | 350          | 28.82                 | 10087.0             |

**Table S2.** Results of BCA quantification of proteins in ovary samples

| Serial number | Sample name | Volumes (μL) | Concentration (μg/μL) | Overall amount (μg) |
|---------------|-------------|--------------|-----------------------|---------------------|
| 1             | G-O-1       | 550          | 8.15                  | 4481.4              |
| 2             | G-O-2       | 550          | 20.88                 | 11484.0             |
| 3             | G-O-3       | 550          | 17.93                 | 9861.5              |
| 4             | H-O-1       | 550          | 15.62                 | 8591.0              |
| 5             | H-O-2       | 550          | 10.156                | 5582.5              |
| 6             | H-O-3       | 550          | 10.2                  | 5610.0              |

**Table S3.** Complete list of pathways of upregulated DEPs enriched in the liver between Groups G and H

| Group | Protein ID     | Gene name    | KEGG pathway               | Classification                      |
|-------|----------------|--------------|----------------------------|-------------------------------------|
| G     | F1NB68         | TGFB1I1      | VEGF signaling pathway     | Signal transduction                 |
|       | AOA1D5PXQ<br>2 | SQSTM1       | Mitophagy - animal         | Transport and catabolism            |
|       | AOA089FGZ<br>4 | /            | Endocytosis                | Transport and catabolism            |
|       | AOA1D5PXQ<br>2 | SQSTM1       | Autophagy - animal         | Transport and catabolism            |
|       | Q98TF5         | RPL39        | Ribosome                   | Translation                         |
|       | AOA3Q2U3X<br>0 | LOC101750889 | ECM-receptor interaction   | Signaling molecules and interaction |
|       | AOA5H1ZRJ7     | COL1A2       | ECM-receptor interaction   | Signaling molecules and interaction |
|       | F1NZZ2         | LAMA5        | ECM-receptor interaction   | Signaling molecules and interaction |
|       | AOA1D5PW<br>N6 | COL6A1       | ECM-receptor interaction   | Signaling molecules and interaction |
|       | AOA1D5PYU<br>1 | COL1A1       | ECM-receptor interaction   | Signaling molecules and interaction |
|       | AOA089FGZ<br>4 |              | Cell adhesion molecules    | Signaling molecules and interaction |
|       | F1C6W3         | B-LB         | Cell adhesion molecules    | Signaling molecules and interaction |
|       | O93417         | CASP3        | TNF signaling pathway      | Signal transduction                 |
|       | AOA1D5PW<br>N6 | COL6A1       | PI3K-Akt signaling pathway | Signal transduction                 |
|       | AOA5H1ZRJ7     | COL1A2       | PI3K-Akt signaling pathway | Signal transduction                 |
|       | F1NZZ2         | LAMA5        | PI3K-Akt signaling pathway | Signal transduction                 |
|       | AOA1D5PYU<br>1 | COL1A1       | PI3K-Akt signaling pathway | Signal transduction                 |
|       | O93417         | CASP3        | MAPK signaling pathway     | Signal transduction                 |
|       | Q90WF1         |              | MAPK signaling pathway     | Signal transduction                 |

|             |         |                                                 |                                             |
|-------------|---------|-------------------------------------------------|---------------------------------------------|
| A0A3Q2UE29  | HK2     | HIF-1 signaling pathway                         | Signal transduction                         |
| Q6QWE7      | ADIPOQ  | AMPK signaling pathway                          | Signal transduction                         |
| E1BX85      | GSTO2   | Glutathione metabolism                          | Metabolism of other amino acids             |
| Q90940      | P22     | Riboflavin metabolism                           | Metabolism of cofactors and vitamins        |
| Q90940      | P22     | Porphyrin metabolism                            | Metabolism of cofactors and vitamins        |
| F1N9P5      | ABCD4   | ABC transporters                                | Membrane transport                          |
| F1NI89      | ADH4    | Fatty acid degradation                          | Lipid metabolism                            |
| F1NYK6      | CBR4    | Fatty acid biosynthesis                         | Lipid metabolism                            |
| A0A1D5P6E8  | CDH15   | Fatty acid biosynthesis                         | Lipid metabolism                            |
| Q5F370      | PTGR2   | Arachidonic acid metabolism                     | Lipid metabolism                            |
| Q75UT8      | pkc     | Protein processing in endoplasmic reticulum     | Folding, sorting and degradation            |
| E1BZT9      | ACSS1B  | Methane metabolism                              | Energy metabolism                           |
| F1NI89      | ADH4    | Methane metabolism                              | Energy metabolism                           |
| E1BZT9      | ACSS1B  | Carbon fixation pathways in prokaryotes         | Energy metabolism                           |
| A0A5H1ZRJ7  | COL1A2  | Focal adhesion                                  | Cellular community - eukaryotes             |
| F1NB68      | TGFB1I1 | Focal adhesion                                  | Cellular community - eukaryotes             |
| Q90WF1      |         | Focal adhesion                                  | Cellular community - eukaryotes             |
| F1NZZ2      | LAMA5   | Focal adhesion                                  | Cellular community - eukaryotes             |
| A0A1D5PW N6 | COL6A1  | Focal adhesion                                  | Cellular community - eukaryotes             |
| A0A1D5PYU1  | COL1A1  | Focal adhesion                                  | Cellular community - eukaryotes             |
| R4GF71      | TMSB4X  | Regulation of actin cytoskeleton                | Cell motility                               |
| F1NB68      | TGFB1I1 | Regulation of actin cytoskeleton                | Cell motility                               |
| O93417      | CASP3   | p53 signaling pathway                           | Cell growth and death                       |
| P08267      | FTH     | Ferroptosis                                     | Cell growth and death                       |
| A0A089FGZ4  |         | Cellular senescence                             | Cell growth and death                       |
| A0A1D5PXQ2  | SQSTM1  | Cellular senescence                             | Cell growth and death                       |
| O93417      | CASP3   | Apoptosis - multiple species                    | Cell growth and death                       |
| P07032      | ACYP1   | Pyruvate metabolism                             | Carbohydrate metabolism                     |
| E1BZT9      | ACSS1B  | Pyruvate metabolism                             | Carbohydrate metabolism                     |
| F1NI89      | ADH4    | Pyruvate metabolism                             | Carbohydrate metabolism                     |
| E1BZT9      | ACSS1B  | Propanoate metabolism                           | Carbohydrate metabolism                     |
| E1BZT9      | ACSS1B  | Glycolysis / Gluconeogenesis                    | Carbohydrate metabolism                     |
| F1NI89      | ADH4    | Glycolysis / Gluconeogenesis                    | Carbohydrate metabolism                     |
| A0A3Q2UE29  | HK2     | Glycolysis / Gluconeogenesis                    | Carbohydrate metabolism                     |
| A0A3Q2UE29  | HK2     | Fructose and mannose metabolism                 | Carbohydrate metabolism                     |
| A0A3Q2UE29  | HK2     | Streptomycin biosynthesis                       | Biosynthesis of other secondary metabolites |
| A0A3Q2UE29  | HK2     | Neomycin, kanamycin and gentamicin biosynthesis | Biosynthesis of other secondary metabolites |

|   |            |          |                                            |                                      |
|---|------------|----------|--------------------------------------------|--------------------------------------|
| H | A0A1D5P6E8 | CDH15    | Valine, leucine and isoleucine degradation | Amino acid metabolism                |
|   | F1NI89     | ADH4     | Tyrosine metabolism                        | Amino acid metabolism                |
|   | E1BVP5     | ASPA     | Histidine metabolism                       | Amino acid metabolism                |
|   | F1N914     | PYCR1    | Arginine and proline metabolism            | Amino acid metabolism                |
|   | E1BSN3     | L3HYPDH  | Arginine and proline metabolism            | Amino acid metabolism                |
|   | A0A1L1RR71 | ALDH18A1 | Arginine and proline metabolism            | Amino acid metabolism                |
|   | A0A1D5PD08 | PNPO     | Vitamin B6 metabolism                      | Metabolism of cofactors and vitamins |
|   | P79760     | CYP1A4   | Tryptophan metabolism                      | Amino acid metabolism                |
|   | F1NEK9     | ACMSD    | Tryptophan metabolism                      | Amino acid metabolism                |
|   | A0A1D5P0J6 | TDO2     | Tryptophan metabolism                      | Amino acid metabolism                |
|   | A0A1L1RP39 | UGP2     | Pentose and glucuronate interconversions   | Carbohydrate metabolism              |
|   | A0A1L1RJ8  | TUBA4A   | Gap junction                               | Cellular community - eukaryotes      |
|   | A0A1D5PD08 | PNPO     | Biosynthesis of cofactors                  | Global and overview maps             |
|   | F1NEK8     | GCH1     | Biosynthesis of cofactors                  | Global and overview maps             |
|   | A0A1D5P0J6 | TDO2     | Biosynthesis of cofactors                  | Global and overview maps             |
|   | A0A1L1RP39 | UGP2     | Biosynthesis of cofactors                  | Global and overview maps             |
|   | A0A1L1RP39 | UGP2     | O-Antigen nucleotide sugar biosynthesis    | Glycan biosynthesis and metabolism   |
|   | Q5ZM72     | FAR1     | Cutin, suberine and wax biosynthesis       | Lipid metabolism                     |
|   | E7EDS8     | FADS1    | Biosynthesis of unsaturated fatty acids    | Lipid metabolism                     |
|   | F1NEK8     | GCH1     | Folate biosynthesis                        | Metabolism of cofactors and vitamins |
|   | F1P2A6     | ADA      | Purine metabolism                          | Nucleotide metabolism                |
|   | A0A3Q2U134 | GLUL     | Two-component system                       | Signal transduction                  |
|   | A0A3Q3B2T4 | HBS1L    | mRNA surveillance pathway                  | Translation                          |

**Table S4.** Complete list of pathways of upregulated DEPs enriched in the ovary between Groups G and H

| Group | Protein ID | Gene Name | KEGG pathway                   | Classification           |
|-------|------------|-----------|--------------------------------|--------------------------|
| G     | A0A3Q2UPM7 | PEX11B    | Peroxisome                     | Transport and catabolism |
|       | A0A3Q2TZN9 | GABARAPL2 | Mitophagy - yeast              | Transport and catabolism |
|       | A0A1D5PXV5 | SP1       | Mitophagy - animal             | Transport and catabolism |
|       | A0A3Q2TZN9 | GABARAPL2 | Mitophagy - animal             | Transport and catabolism |
|       | A0A3Q2TZN9 | GABARAPL2 | Autophagy - yeast              | Transport and catabolism |
|       | A0A3Q2TZN9 | GABARAPL2 | Autophagy - other              | Transport and catabolism |
|       | A0A3Q2TZN9 | GABARAPL2 | Autophagy - animal             | Transport and catabolism |
|       | E1BR45     | TLN2      | Rap1 signaling pathway         | Signal transduction      |
|       | R4GM98     | NME3      | MAPK signaling pathway - plant | Signal transduction      |

|   |             |               |                                                        |                                             |
|---|-------------|---------------|--------------------------------------------------------|---------------------------------------------|
| H | Q4ADJ6      | TFEW          | HIF-1 signaling pathway                                | Signal transduction                         |
|   | A0A3Q2U8J2  | G6PC3         | AMPK signaling pathway                                 | Signal transduction                         |
|   | E1BSI0      | PARP3         | Base excision repair                                   | Replication and repair                      |
|   | A0A1D5PXN5  | TXNRD1        | Selenocompound metabolism                              | Metabolism of other amino acids             |
|   | F1NMJ2      | AK4           | Thiamine metabolism                                    | Metabolism of cofactors and vitamins        |
|   | F1NI89      | ADH4          | Retinol metabolism                                     | Metabolism of cofactors and vitamins        |
|   | Q5ZHM4      | RCJMB04_35g11 | Pantothenate and CoA biosynthesis                      | Metabolism of cofactors and vitamins        |
|   | A0A1D5PHB6  | DHX36         | RNA degradation                                        | Folding, sorting and degradation            |
|   | Q5ZJV9      | CNOT7         | RNA degradation                                        | Folding, sorting and degradation            |
|   | F1N986      | CA5A          | Nitrogen metabolism                                    | Energy metabolism                           |
|   | F1NI89      | ADH4          | Methane metabolism                                     | Energy metabolism                           |
|   | F1NTM7      | GOT1          | Carbon fixation in photosynthetic organisms            | Energy metabolism                           |
|   | Q4ADJ6      | TFEW          | Ferroptosis                                            | Cell growth and death                       |
|   | A0A3Q2U8J2  | G6PC3         | Starch and sucrose metabolism                          | Carbohydrate metabolism                     |
|   | F1NI89      | ADH4          | Pyruvate metabolism                                    | Carbohydrate metabolism                     |
|   | A0A3Q2U8J2  | G6PC3         | Glycolysis / Gluconeogenesis                           | Carbohydrate metabolism                     |
|   | F1NI89      | ADH4          | Glycolysis / Gluconeogenesis                           | Carbohydrate metabolism                     |
|   | A0A3Q2U8J2  | G6PC3         | Galactose metabolism                                   | Carbohydrate metabolism                     |
|   | F1NTM7      | GOT1          | Tropane, piperidine and pyridine alkaloid biosynthesis | Biosynthesis of other secondary metabolites |
|   | F1NTM7      | GOT1          | Isoquinoline alkaloid biosynthesis                     | Biosynthesis of other secondary metabolites |
|   | F1NTM7      | GOT1          | Tyrosine metabolism                                    | Amino acid metabolism                       |
|   | F1NTM7      | GOT1          | Phenylalanine, tyrosine and tryptophan biosynthesis    | Amino acid metabolism                       |
|   | F1NTM7      | GOT1          | Cysteine and methionine metabolism                     | Amino acid metabolism                       |
|   | F1NTM7      | GOT1          | Arginine biosynthesis                                  | Amino acid metabolism                       |
|   | F1NTM7      | GOT1          | Arginine and proline metabolism                        | Amino acid metabolism                       |
|   | F1NTM7      | GOT1          | Alanine, aspartate and glutamate metabolism            | Amino acid metabolism                       |
|   | F1NI89      | ADH4          | Tyrosine metabolism                                    | Amino acid metabolism                       |
|   | F1NI89      | ADH4          | Alcoholic liver disease                                | /                                           |
|   | A0A3Q3AW56  | GCDH          | Benzoate degradation                                   | Xenobiotics biodegradation and metabolism   |
|   | A0A1D5NW E6 | LOC107050229  | Lysosome                                               | Transport and catabolism                    |
|   | A0A1D5PU31  | PLA2G15       | Lysosome                                               | Transport and catabolism                    |
|   | F1NJF8      | NAGA          | Lysosome                                               | Transport and catabolism                    |
|   | E1C234      | SUMF1         | Lysosome                                               | Transport and catabolism                    |
|   | F1NZK8      | EFL1          | Ribosome biogenesis in eukaryotes                      | Translation                                 |
|   | F1P2L5      | LSG1          | Ribosome biogenesis in eukaryotes                      | Translation                                 |
|   | F1NJT4      | FN1           | ECM-receptor interaction                               | Signaling molecules and interaction         |

|            |              |                                                            |                                          |
|------------|--------------|------------------------------------------------------------|------------------------------------------|
| P16047     | TGFB3        | Cytokine-cytokine receptor interaction                     | Signaling molecules and interaction      |
| F1NV61     | CASP7        | TNF signaling pathway                                      | Signal transduction                      |
| F1P204     | ABCC1        | Sphingolipid signaling pathway                             | Signal transduction                      |
| A0A3Q2UE75 | NSMAF        | Sphingolipid signaling pathway                             | Signal transduction                      |
| A0A3Q2U5L9 | RPS6KA1      | mTOR signaling pathway                                     | Signal transduction                      |
| P16047     | TGFB3        | Hippo signaling pathway                                    | Signal transduction                      |
| A0A1L1RZ64 | HMGCS1       | Terpenoid backbone biosynthesis                            | Metabolism of terpenoids and polyketides |
| F1NJX8     | FNTA         | Terpenoid backbone biosynthesis                            | Metabolism of terpenoids and polyketides |
| O73888     | HPGDS        | Glutathione metabolism                                     | Metabolism of other amino acids          |
| F1NR99     | CPOX         | Porphyrin metabolism                                       | Metabolism of cofactors and vitamins     |
| F1P204     | ABCC1        | ABC transporters                                           | Membrane transport                       |
| A0A1D5PEM6 | STS          | Steroid hormone biosynthesis                               | Lipid metabolism                         |
| A0A1D5NWE6 | LOC107050229 | Sphingolipid metabolism                                    | Lipid metabolism                         |
| A0A1D5PU31 | PLA2G15      | Glycerophospholipid metabolism                             | Lipid metabolism                         |
| A0A1D5NWE6 | LOC107050229 | Other glycan degradation                                   | Glycan biosynthesis and metabolism       |
| F1NJF8     | NAGA         | Glycosphingolipid biosynthesis - globo and isoglobo series | Glycan biosynthesis and metabolism       |
| A0A3Q2UFW3 | STX5         | SNARE interactions in vesicular transport                  | Folding, sorting and degradation         |
| F1NBN1     | SEC61A1      | Protein export                                             | Folding, sorting and degradation         |
| A0A1D5NUY6 | NDUFC2       | Oxidative phosphorylation                                  | Energy metabolism                        |
| Q5F3V2     | RCJMB04_6f14 | Carbon fixation pathways in prokaryotes                    | Energy metabolism                        |
| A1E345     | F11R         | Tight junction                                             | Cellular community - eukaryotes          |
| F1NJT4     | FN1          | Regulation of actin cytoskeleton                           | Cell motility                            |
| A0A3Q2U5L9 | RPS6KA1      | Oocyte meiosis                                             | Cell growth and death                    |
| F1NV61     | CASP7        | Apoptosis - multiple species                               | Cell growth and death                    |
| F1P5S5     | ACSS3        | Propanoate metabolism                                      | Carbohydrate metabolism                  |
| A0A1L1RP44 | RBKS         | Pentose phosphate pathway                                  | Carbohydrate metabolism                  |
| Q5F3V2     | RCJMB04_6f14 | Citrate cycle (TCA cycle)                                  | Carbohydrate metabolism                  |
| A0A1L1RZ64 | HMGCS1       | Butanoate metabolism                                       | Carbohydrate metabolism                  |
| A0A1L1RZ64 | HMGCS1       | Valine, leucine and isoleucine degradation                 | Amino acid metabolism                    |
| A0A3Q3AW56 | GCDH         | Tryptophan metabolism                                      | Amino acid metabolism                    |
| A0A3Q3AW56 | GCDH         | Lysine degradation                                         | Amino acid metabolism                    |
| E1C378     | HNMT         | Histidine metabolism                                       | Amino acid metabolism                    |

**Table S5.** Complete list of pathways of upregulated DMs enriched in the liver between Groups G and H

| Group | Metabolite | KEGG pathway | Classification |
|-------|------------|--------------|----------------|
|-------|------------|--------------|----------------|

|   |                                      |                                                     |                                          |
|---|--------------------------------------|-----------------------------------------------------|------------------------------------------|
|   | O-phosphoethanolamine                | Sphingolipid metabolism                             | Lipid metabolism                         |
|   | Taurocholate                         | Primary bile acid biosynthesis                      | Lipid metabolism                         |
|   | Camp                                 | MAPK signaling pathway                              | Signal transduction                      |
|   | Camp                                 | Calcium signaling pathway                           | Signal transduction                      |
|   | Camp                                 | Apelin signaling pathway                            | Signal transduction                      |
|   | Camp                                 | Oocyte meiosis                                      | Cell growth and death                    |
|   | Cis-7,10,13,16-docosatetraenoic acid | Ferroptosis                                         | Cell growth and death                    |
|   | Glutathione                          | Ferroptosis                                         | Cell growth and death                    |
|   | Pyruvate                             | Terpenoid backbone biosynthesis                     | Metabolism of terpenoids and polyketides |
|   | Pyruvate                             | Pyruvate metabolism                                 | Carbohydrate metabolism                  |
|   | DL-a-hydroxybutyric acid             | Propanoate metabolism                               | Carbohydrate metabolism                  |
|   | Pyruvate                             | Pentose and glucuronate interconversions            | Carbohydrate metabolism                  |
|   | Pyruvate                             | Glycolysis / Gluconeogenesis                        | Carbohydrate metabolism                  |
|   | Pyruvate                             | Citrate cycle (TCA cycle)                           | Carbohydrate metabolism                  |
|   | L-Arabinono-1,4-lactone              | Ascorbate and aldarate metabolism                   | Carbohydrate metabolism                  |
|   | Pyruvate                             | Ascorbate and aldarate metabolism                   | Carbohydrate metabolism                  |
|   | Pyruvate                             | Taurine and hypotaurine metabolism                  | Metabolism of other amino acids          |
|   | Taurocholate                         | Taurine and hypotaurine metabolism                  | Metabolism of other amino acids          |
|   | Cys-gly                              | Glutathione metabolism                              | Metabolism of other amino acids          |
|   | Glutathione                          | Glutathione metabolism                              | Metabolism of other amino acids          |
| G | Methanesulfonic acid                 | Sulfur metabolism                                   | Energy metabolism                        |
|   | Camp                                 | Progesterone-mediated oocyte maturation             | Endocrine system                         |
|   | Camp                                 | Insulin signaling pathway                           | Endocrine system                         |
|   | Camp                                 | GnRH signaling pathway                              | Endocrine system                         |
|   | 4-pyridoxic acid                     | Vitamin B6 metabolism                               | Metabolism of cofactors and vitamins     |
|   | Pyruvate                             | Thiamine metabolism                                 | Metabolism of cofactors and vitamins     |
|   | Ketoleucine                          | Valine, leucine and isoleucine degradation          | Amino acid metabolism                    |
|   | Ketoleucine                          | Valine, leucine and isoleucine biosynthesis         | Amino acid metabolism                    |
|   | Pyruvate                             | Valine, leucine and isoleucine biosynthesis         | Amino acid metabolism                    |
|   | 4-imidazoleacetic acid               | Histidine metabolism                                | Amino acid metabolism                    |
|   | Anserine                             | Histidine metabolism                                | Amino acid metabolism                    |
|   | Histamine                            | Histidine metabolism                                | Amino acid metabolism                    |
|   | N-acetylhistamine                    | Histidine metabolism                                | Amino acid metabolism                    |
|   | Pyruvate                             | Alanine, aspartate and glutamate metabolism         | Amino acid metabolism                    |
|   | 4-hydroxyphenylpyruvate              | Phenylalanine, tyrosine and tryptophan biosynthesis | Amino acid metabolism                    |
|   | Phenylpyruvate                       | Phenylalanine, tyrosine and tryptophan biosynthesis | Amino acid metabolism                    |
|   | Phenylpyruvate                       | Phenylalanine metabolism                            | Amino acid metabolism                    |
|   | Pyruvate                             | Phenylalanine metabolism                            | Amino acid metabolism                    |
|   | Camp                                 | Hedgehog signaling pathway                          | Signal transduction                      |

|   |                              |                                 |                                      |
|---|------------------------------|---------------------------------|--------------------------------------|
|   | Camp                         | Melanogenesis                   | Endocrine system                     |
|   | Uridine                      | Pyrimidine metabolism           | Nucleotide metabolism                |
|   | Lumichrome                   | Riboflavin metabolism           | Metabolism of cofactors and vitamins |
|   | Lysine                       | Biotin metabolism               | Metabolism of cofactors and vitamins |
|   | Glyceric acid                | Glycerolipid metabolism         | Lipid metabolism                     |
|   | Palmitic acid                | Fatty acid elongation           | Lipid metabolism                     |
|   | Cis-9-palmitoleic acid       | Fatty acid biosynthesis         | Lipid metabolism                     |
| H | Palmitic acid                | Fatty acid biosynthesis         | Lipid metabolism                     |
|   | Linolenic acid               | alpha-Linolenic acid metabolism | Lipid metabolism                     |
|   | Serotonin                    | Tryptophan metabolism           | Amino acid metabolism                |
|   | 3-(2-hydroxyethyl) indole    | Tryptophan metabolism           | Amino acid metabolism                |
|   | 3-hydroxyanthranilic acid    | Tryptophan metabolism           | Amino acid metabolism                |
|   | N-acetyl-5-hydroxytryptamine | Tryptophan metabolism           | Amino acid metabolism                |
|   | Lysine                       | Aminoacyl-tRNA biosynthesis     | Translation                          |

**Table S6.** Complete list of pathways of upregulated DMs enriched in the ovary between Groups G and H

| Group | Metabolite                         | KEGG pathway                             | Classification                       |
|-------|------------------------------------|------------------------------------------|--------------------------------------|
| G     | DL-a-hydroxybutyric acid           | Propanoate metabolism                    | Carbohydrate metabolism              |
|       | Glycolate                          | Glyoxylate and dicarboxylate metabolism  | Carbohydrate metabolism              |
|       | Pyridoxal phosphate                | Vitamin B6 metabolism                    | Metabolism of cofactors and vitamins |
|       | Pyridoxal phosphate                | Thiamine metabolism                      | Metabolism of cofactors and vitamins |
|       | L-pipecolic acid                   | Lysine degradation                       | Amino acid metabolism                |
|       | 1-methyl-L-histidine               | Histidine metabolism                     | Amino acid metabolism                |
|       | D-sorbitol                         | ABC transporters                         | Membrane transport                   |
| H     | Chenodeoxycholate                  | Primary bile acid biosynthesis           | Lipid metabolism                     |
|       | 2-Dehydro-3-deoxy-D-gluconate      | Pentose phosphate pathway                | Carbohydrate metabolism              |
|       | 2-Dehydro-3-deoxy-D-gluconate      | Pentose and glucuronate interconversions | Carbohydrate metabolism              |
|       | D-sorbitol                         | Galactose metabolism                     | Carbohydrate metabolism              |
|       | D-sorbitol                         | Fructose and mannose metabolism          | Carbohydrate metabolism              |
|       | 3,4-dihydroxymandelic acid         | Tyrosine metabolism                      | Amino acid metabolism                |
|       | 1-aminocyclopropanecarboxylic acid | Cysteine and methionine metabolism       | Amino acid metabolism                |

**Table S7.** Antibody information for western blotting.

| Company                 | Protein | Protein weight (kDa) | molecular | Source | Dilution ratio |
|-------------------------|---------|----------------------|-----------|--------|----------------|
| ZenBio (Chengdu, China) | ADH4    | 37                   |           | Rabbit | 1:1000         |
| ZenBio (Chengdu, China) | FADS1   | 52                   |           | Rabbit | 1:1000         |
| ZenBio (Chengdu, China) | STS     | 65                   |           | Rabbit | 1:1000         |
| ZenBio (Chengdu, China) | HMGCS1  | 57                   |           | Rabbit | 1:1000         |

**A**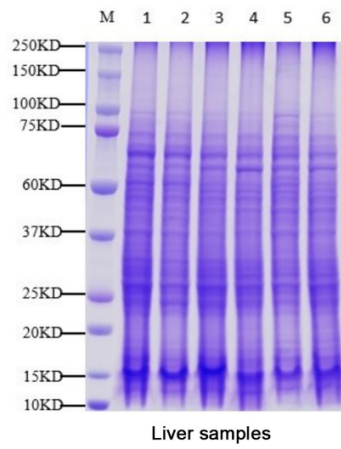**B**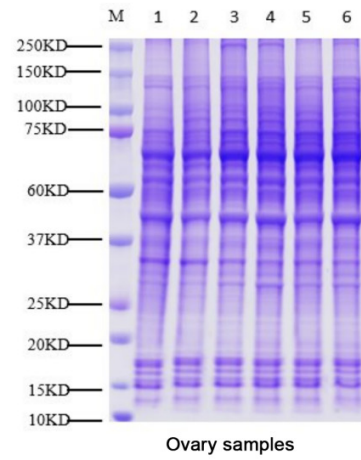

**Figure S1.** SDS-PAGE results of protein samples from liver and ovary. **(A)** results of SDS-PAGE of proteins in liver samples. **(B)** results of SDS-PAGE of proteins in ovary samples.



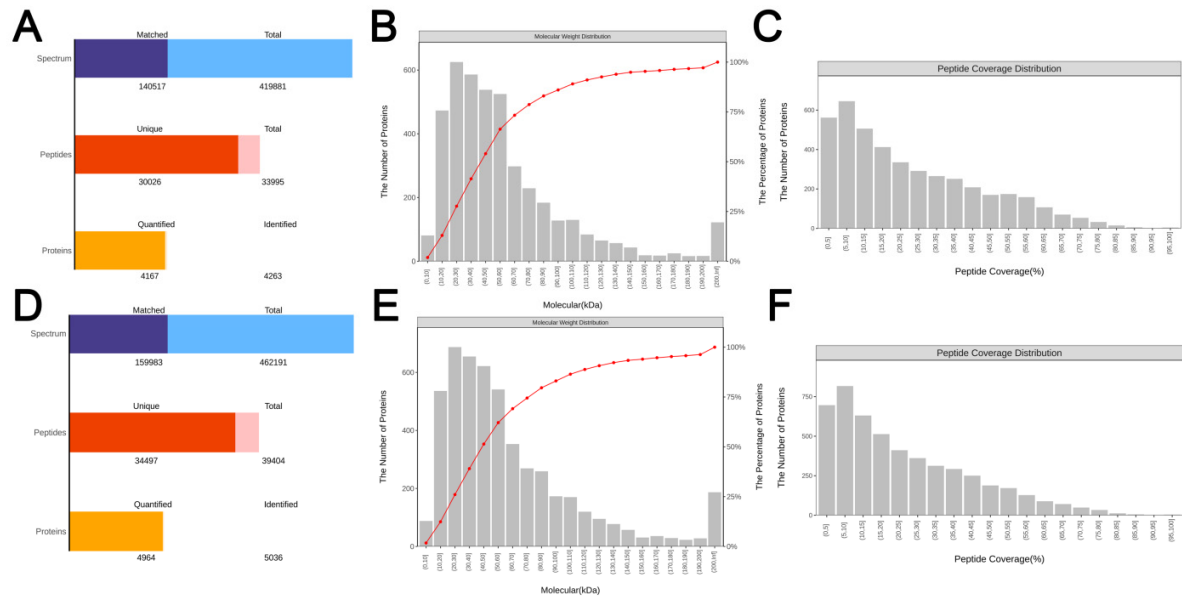

**Figure S2.** Identification of DEPs in the liver and ovary between Groups G and H. **(A)** identification and quantitative results of proteins and peptides in the liver. **(B)** protein mass distribution in the liver. The X-axis was protein mass interval (kDa), and the Y-axis was the number of proteins. **(C)** protein coverage distribution in the liver. The X-axis showed the percentage coverage interval, and the Y-axis showed the number of proteins. **(D)** identification and quantitative results of proteins and peptides in the ovary. **(E)** protein mass distribution in the ovary. **(F)** protein coverage distribution in the ovary.

A

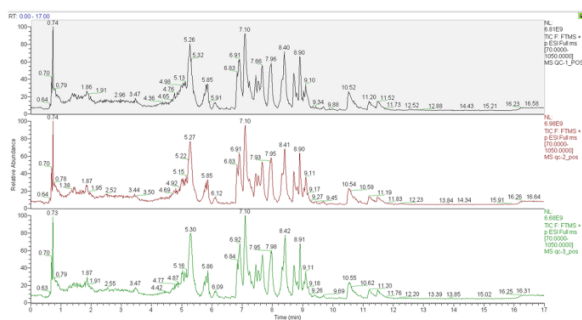

B

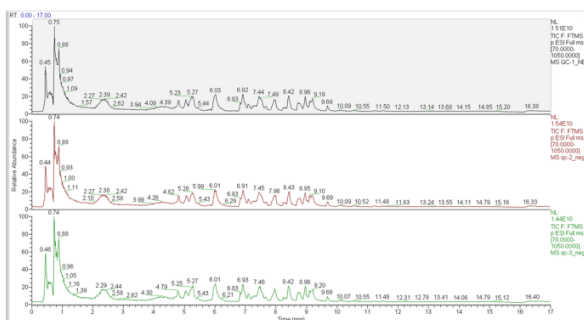

C

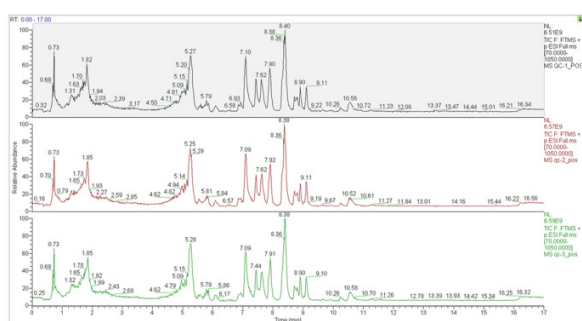

D

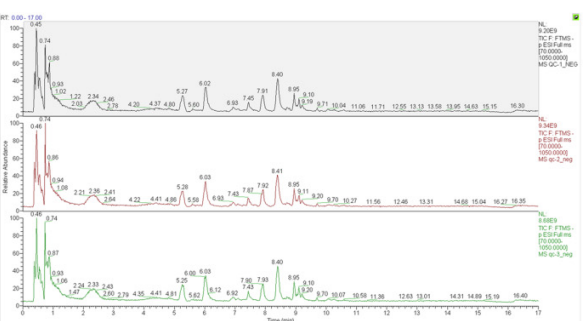

**Figure S3.** Overlapping spectra of total ion mobility maps of QC samples in positive and negative ion mode. (A, B) overlaid spectra of total ion mobility plots of QC samples of liver in positive and negative ion mode. (C, D) overlaid spectra of total ion mobility plots of QC samples of ovary in positive and negative ion mode.

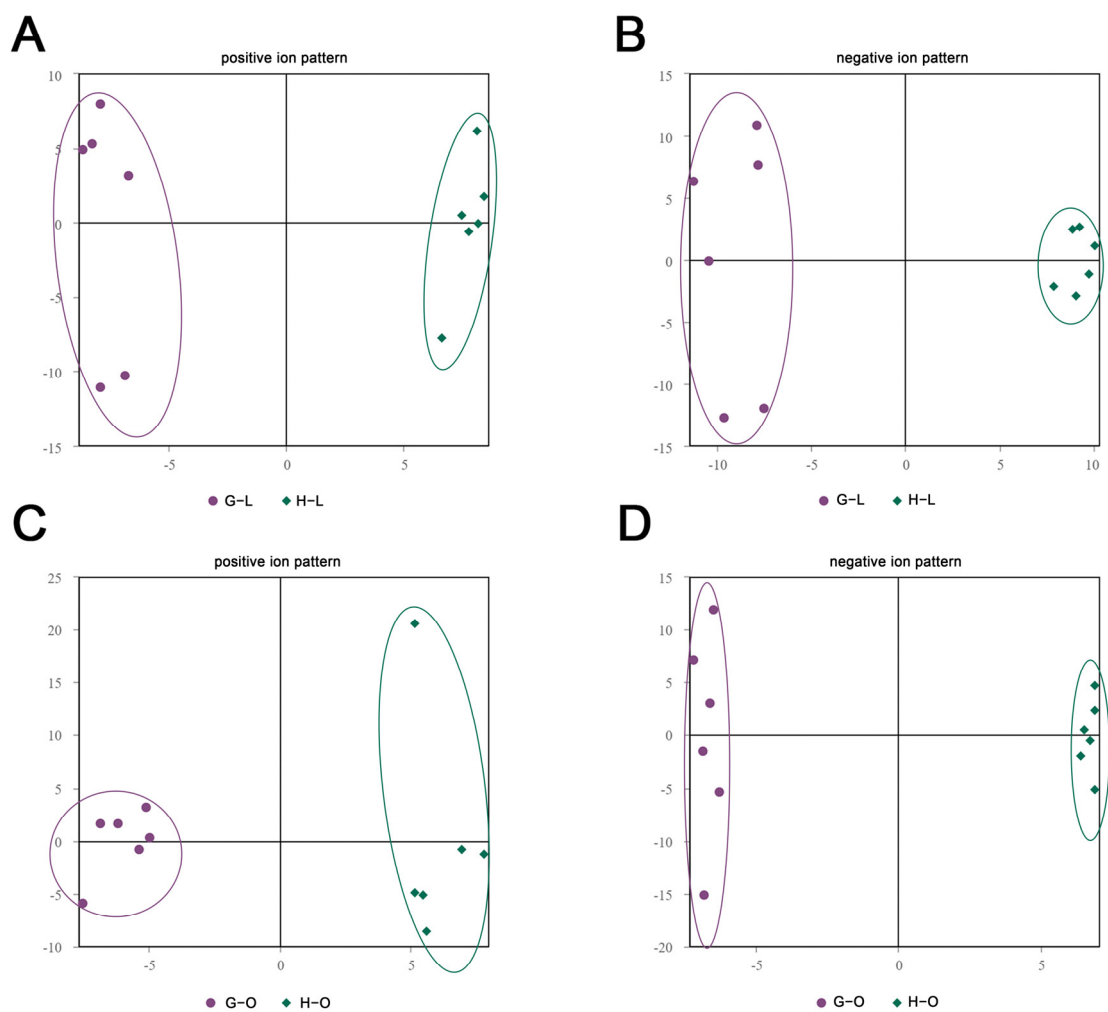

**Figure S4.** OPLS-DA score plot in positive and negative ion mode. **(A, B)** plot of OPLS-DA scores of liver metabolites in positive and negative ion patterns of Groups G and H. **(C, D)** plot of OPLS-DA scores of ovary metabolites in positive and negative ion patterns of Groups G and H.
